# Supplementary material for: Chronic exposure to warm temperature causes low sperm abundance and quality in Drosophila melanogaster
Source: PubMed Central journal article supplement (PMC10387475; doi:10.1038/s41598-023-39360-7), 2023-07-30
Supplement: 41598_2023_39360_MOESM1_ESM.pdf [file 41598_2023_39360_MOESM1_ESM.pdf]

**Supplemental material for**

**Chronic exposure to warm temperature  
causes low sperm abundance and quality in  
*Drosophila melanogaster***

**Ana Caroline P. Gandara<sup>1,2</sup> and Daniela Drummond-Barbosa<sup>1,2\*</sup>**

<sup>1</sup>Department of Genetics, University of Wisconsin – Madison, Madison, WI,  
53706, USA

<sup>2</sup>Morgridge Institute for Research, Madison, WI, 53706, USA

\*Corresponding author: [ddbarbosa@wisc.edu](mailto:dobarbosa@wisc.edu)

SUPPLEMENTAL FIGURE

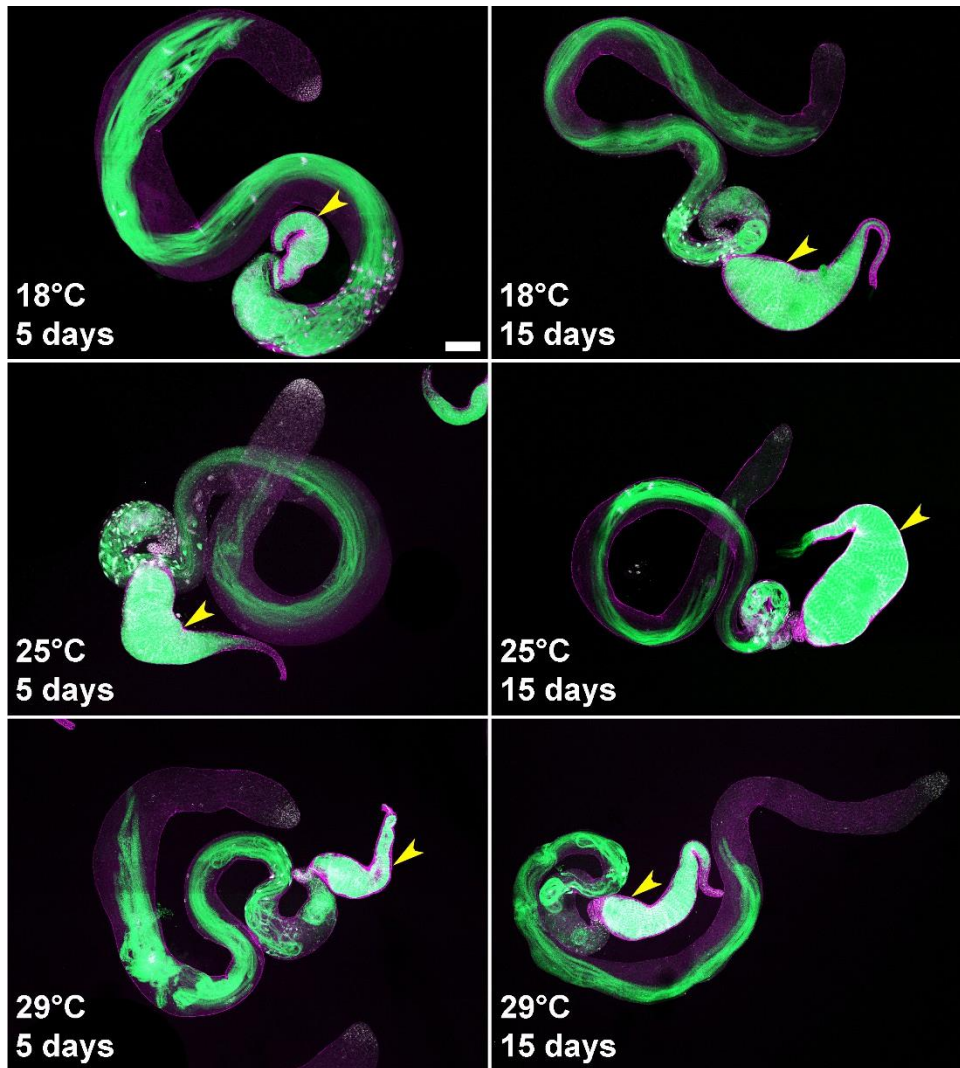

**Figure S1. Whole testes from males maintained at different temperatures.**

Representative whole testes images from *w\**; *ProtB-GFP*; *dj-GFP* males incubated at 18°C, 25°C, or 29°C for five or 15 days used for analysis shown in Fig. 3C,D.

Phalloidin (magenta), actin; GFP (green), Protamin B (labels germ cell nuclei starting in late canoe stage) and Don Juan (labels sperm tails); DAPI (white), nuclei.

## SUPPLEMENTAL TABLES

**Table S1. Numbers of spermatheca pairs analyzed for sperm motility**

| Temperature | 5 days* | 10 days* | 15 days* | 20 days* |
|-------------|---------|----------|----------|----------|
| 18°C        | 10      | 16       | 14       | 22       |
| 25°C        | 7       | 17       | 25       | 12       |
| 29°C        | 9       | 17       | 13       | 18       |

\*100% of sperm-containing spermathecae had motile sperm.

**Table S2. Numbers of eggs in different categories from 12-hour collection**

**testing effects of temperature on sperm quality**

| Temperature | Dead*                   | Stage 1*   | Stage 2+*   | Unfertilized* | Total |
|-------------|-------------------------|------------|-------------|---------------|-------|
| 25°C        | 45<br>(20) <sup>#</sup> | 9<br>(4)   | 164<br>(73) | 08<br>(3.5)   | 226   |
| 29°C        | 184<br>(66)             | 46<br>(16) | 0<br>(0)    | 50<br>(18)    | 280   |

\*These categories are explained in the text and Fig. 6C, and these same data are graphed in Fig. 6D.

<sup>#</sup>Percentages are shown in parentheses.

## SUPPLEMENTAL MOVIE LEGENDS

**Movie S1. Representative spermatheca pair containing sperm from *w\**; *ProtB-GFP*; *dj-GFP* males maintained at 18°C for 20 days.** Sperm show normal motility in both spermathecae (arrows) and in seminal receptacle (asterisk). GFP (green), Protamin B (sperm nuclei) and Don Juan (sperm tails).

**Movie S2. Representative spermatheca pair containing sperm from *w\**; *ProtB-GFP*; *dj-GFP* males maintained at 25°C for 20 days.** Sperm show normal

motility in both spermathecae (arrows) and in seminal receptacle (asterisk). GFP (green), Protamin B (sperm nuclei) and Don Juan (sperm tails).

**Movie S3. Representative spermatheca pair with sperm from *w\**; *ProtB-GFP*; *dj-GFP* males maintained at 29°C for 20 days.** Sperm show normal motility in both spermathecae (arrows) and in seminal receptacle (asterisk). The spermatheca on the left has fewer than 10 spermatozoa. GFP (green), Protamin B (sperm nuclei) and Don Juan (sperm tails).
